# Supplementary material
Source: Copernicus journal article supplement (doi:10.5194/egusphere-2026-2016)
Supplement: Supplementary file 1 [file egusphere-2026-2016-supplement.pdf]

# **Behavioral feedbacks reshape blue–green water scarcity and sustainability trade-offs in irrigated agriculture: A sociohydrological perspective**

**Youzhen Lu<sup>1</sup>, Shengqian Zhang<sup>1</sup>, Mengyang Wu<sup>1</sup>, Jan F. Adamowski<sup>2</sup>, Xinchun Cao<sup>1, 2\*</sup>**

<sup>1</sup> College of Agricultural Science and Engineering, Hohai University, Nanjing, 210098, China

<sup>2</sup> Department of Bioresource Engineering, Faculty of Agricultural & Environmental Sciences, McGill University, Québec H9X 3V9, Canada

Corresponding author: Xinchun Cao ([caoxinchun@hhu.edu.cn](mailto:caoxinchun@hhu.edu.cn))

## Contents of this file

Text S1 to S3

Figures S1

Tables S1 to S4

## Introduction

This Supporting Information summarizes the coupled SWAT–agent-based modeling framework, detailing the farmer decision module (rolling-horizon MIP optimization), the SWAT setup and coupling interface (HRU–agent mapping, irrigation scheduling, and calibration/validation), and the associated supplementary materials (Tables S1–S4 and Figure S1).

### Text S1. Optimization Model for Multi-Year Production Planning

Optimization Logic (Rolling Horizon Strategy): Agents employ a Rolling Horizon Optimization Strategy with a planning window of  $n$  years. At the beginning of each simulation year, agents utilize updated forecasts to formulate a comprehensive production plan (crop type, irrigation technology, and irrigation depth) that maximizes the cumulative expected net present value (NPV) (Duan et al., 2024) over the next years. The underlying mathematical problem is formulated as a Mixed-Integer Programming (MIP) model and solved using the Gurobi Optimizer. Reflecting the prevalent double-cropping system in the study area, Winter Wheat is treated as the fixed, mandatory crop for the winter season. Consequently, the agent's active decision-making—regarding crop selection, water allocation—is exclusively restricted to the spring season. Although the optimization yields a trajectory for the entire horizon, only the decision corresponding to the immediate planning year ( $t=1$ ) is implemented as the actual farming practice.

(1) Sets and Indices:

$t \in \{1, 2, \dots, n\}$ : Index for planning years, where  $t=1$  represents the current decision year.

$c \in C$ : Set of spring crops {Maize, Soybean, Peanut}.

$k \in K$ : Set of irrigation technologies {Conventional, Sprinkler, Drip}.

(2) Decision Variables:

$\delta_{c,k,t}$ : Binary variable, equal to 1 if spring crop  $c$  is cultivated using technology  $k$  in year  $t$ , 0 otherwise.

$I_{c,t}$ : Continuous variable, representing the gross irrigation depth (mm) applied to the crop in year  $t$ .

(3) Objective Function: Maximize the discounted cumulative profit:

$$MAX(B) = \sum_{t=1}^n \frac{1}{(1+r)^{t-1}} (\sum_{c \in C} \sum_{k \in K} \delta_{c,k,t} \cdot profit_{c,k,t}) \quad (1)$$

$$profit_{c,k,t} = Y_c(W_{root,t}) \cdot P_c - (C_{fix,c} + C_{tech,k} + C_{water} \cdot I_{c,t}/\eta_k) \quad (2)$$

Crop Water Production Function: To accurately quantify the impact of water stress on crop productivity, we adopt a quadratic crop water production function:

$$\begin{cases} Y_c = \theta_c \times Y_{c,max} \\ \theta_c = a_c \cdot W_{root,c}^2 + b_c \cdot W_{root,c} + C_c \\ W_{root,c} = (W_{per,c} + I_c)/W_{root,max} \end{cases} \quad (3)$$

Where  $Y_{c,max}$  is the potential maximum yield of crop  $c$  under optimal water conditions (kg/ha);  $\theta_c$  is the relative yield coefficient (0 to 1), representing the reduction factor due to water stress (Nozari et al., 2024); Empirical coefficients  $a_c, b_c, c_c$  are crop-specific parameters derived by fitting water–yield response curves using data from (Mialyk et al., 2024); the calibrated values are provided in Table S1.  $W_{root,max}$  maximum total water availability in the root zone;  $W_{per,c}$  perceived effective precipitation (mm);  $I_c$  irrigation depth (Decision Variable, mm).  $\eta_k$  is irrigation efficiency.

(4) Constraints:

Mutually Exclusive Choice (Spring Season): In each year, exactly one spring crop-technology combination must be selected:

$$\sum_{c \in C} \sum_{k \in K} \delta_{c,k,t} = 1 \quad \forall t \in \{1, 2, \dots, n\} \quad (4)$$

Crop-Specific Irrigation Quota Constraint: The irrigation depth applied to the spring crop must not exceed its specific allocated quota:

$$0 \leq I_t \leq \sum_{c \in C} \sum_{k \in K} (\delta_{c,k,t} \cdot Q_{max,c}) \quad \forall t \in \{1, 2, \dots, n\} \quad (5)$$

## Text S2. SWAT model setup

**Spatial Discretization and Drainage Network:** Given the flat topography of the study area, a "stream burning" technique was employed to improve the accuracy of watershed segmentation. The drainage canal network, manually digitized from Google Earth high-resolution imagery, was superimposed onto the DEM to define the hydrological flow paths. Consequently, the watershed was discretized into 814 Hydrologic Response Units (HRUs).

**Coupling Interface: HRU-Agent Mapping:** A critical one-to-one mapping strategy was established to link the SWAT model with the ABM module. Specifically, the 664 agricultural HRUs were conceptualized as 664 individual farming agents. Through this interface, static attributes (e.g., area, soil type) and dynamic environmental variables (e.g., historical precipitation) of each HRU were directly projected onto the corresponding agents in the ABM.

Management Operations and Irrigation Scheduling: Agro-management practices, including crop phenology and fertilization, were parameterized based on records from the local irrigation authority. For simulation simplicity, we assumed static annual schedules for planting and fertilization, with uniform fertilizer application rates across all agricultural HRUs. The Yahekou Reservoir serves as the primary irrigation source. Daily observed outflow data were input into the model to define water availability. To accurately simulate the district's rotational and continuous irrigation schemes, the 664 agents were stratified into four temporal batches based on their hydraulic distance from the canal intake. This setup allows for the spatial-temporal staggering of irrigation events, mirroring actual water allocation protocols. Table S2 presents specific management operations.

Calibration and Validation: Model hydrological parameters were calibrated using the SWAT-CUP software. Figure S1 illustrates the comparison between simulated and observed monthly streamflow during both calibration and validation periods, demonstrating satisfactory model performance. Table S3 displays the calibrated parameter values.

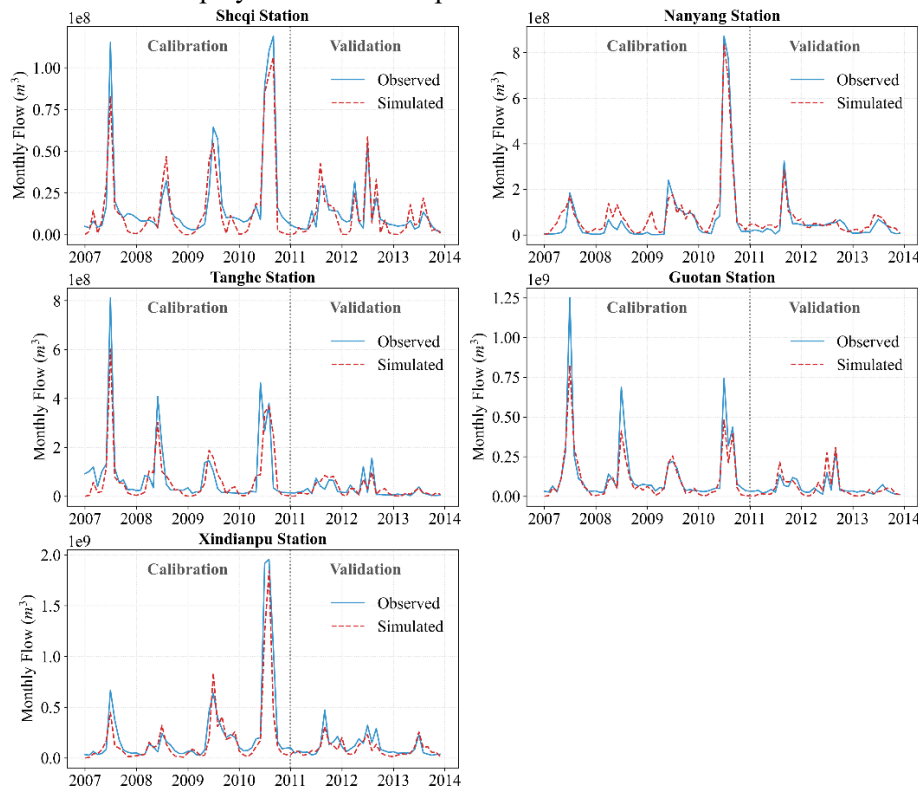

**Figure S1.** Comparison of Observed and Simulated Monthly Streamflow for Model Calibration and Validation (2007–2013).

**Table S1.** Crop-specific water–yield response parameters and variables used in this study.

| Variable/parameter | corn | soybean | peanut |
|--------------------|------|---------|--------|
|--------------------|------|---------|--------|

|                   |         |        |         |
|-------------------|---------|--------|---------|
| $Y_{c,max}$ t/ha  | 5.409   | 2.0543 | 3.427   |
| $W_{root,max}$ mm | 403.933 | 518.35 | 516.925 |
| $a_c$             | -6.81   | -5.98  | -8.929  |
| $b_c$             | 12.35   | 11.412 | 16.51   |
| $c_c$             | -4.59   | -4.44  | -6.63   |

**Table S2.** Management operations

| Management operation | Data          | Crop    | Irrigation Depth(mm) | Fertilizer ratio (N-P2O5-K2O) |
|----------------------|---------------|---------|----------------------|-------------------------------|
| Planting             | June 10       | Peanut  |                      | 28-10-10 600kg/ha             |
|                      | June 15       | Corn    |                      | 28-10-10 450kg/ha             |
|                      | June 15       | Soybean |                      | 10/20/20 225kg/ha             |
|                      | Oct. 20       | Wheat   |                      | 28-10-10 450kg/ha             |
| Irrigation           | July 4-15     | Peanut  | 60                   |                               |
|                      | Aug. 6-15     |         | 60                   |                               |
|                      | July 4-15     | Corn    | 55                   |                               |
|                      | Aug. 1-10     |         | 55                   |                               |
|                      | July 4-15     | Soybean | 50                   |                               |
|                      | Aug. 11-20    |         | 50                   |                               |
|                      | Sept. 8-12    |         | 50                   |                               |
|                      | Dec. 1-15     |         | 50                   |                               |
|                      | Mar. 16-25    | Wheat   | 50                   |                               |
|                      | Apr. 26- May5 |         | 50                   |                               |
| Harvest              | Oct. 10       | Peanut  |                      |                               |
|                      | Sept. 15      | Corn    |                      |                               |
|                      | Oct. 20       | Soybean |                      |                               |
|                      | May 31        | Wheat   |                      |                               |

**Table S3.** Calibrated parameters

| Parameters | Description                                      | Values/relative change |
|------------|--------------------------------------------------|------------------------|
| CN2        | Initial SCS CN II value                          | +0.1908                |
| ALPHA_BF   | Baseflow alpha factor                            | 0.915                  |
| GW_DELAY   | Groundwater delay time                           | 295.02                 |
| SURLAG     | Surface runoff lag coefficient                   | 2.995                  |
| OV_N       | Manning's "n" value for overland flow            | 0.357                  |
| ESCO       | Soil evaporation compensation factor             | 0.739                  |
| GW_REVAP   | Groundwater "Revap" coefficient                  | 0.178                  |
| CH_N2      | Manning's "n" value for main channel             | 0.010                  |
| CH_K2      | Effective hydraulic conductivity in main channel | 225.505                |
| ALPHA_BNK  | Baseflow alpha factor for bank storage           | 0.385                  |
| SOL_K      | Saturated hydraulic conductivity                 | +0.443                 |
| SOL_AWC    | Available water capacity of the soil layer       | -0.1086                |
| SOL_BD     | Moist bulk density                               | +0.091                 |

**Table S4.** Data sources

| Data type | Input data | Data source |
|-----------|------------|-------------|
|           |            |             |

|                 |                                                                            |                                                                                                                                                         |
|-----------------|----------------------------------------------------------------------------|---------------------------------------------------------------------------------------------------------------------------------------------------------|
| Meteorological  | Precipitation, temperature, Relative humidity, solar radiation, wind speed | National meteorological science data sharing service platform ( <a href="https://data.cma.cn/site/index.html">https://data.cma.cn/site/index.html</a> ) |
| Streamflow data | Daily runoff                                                               | Hydrological Yearbook of the People's Republic of China                                                                                                 |
| Spatial         | Land use (30m resolution)                                                  | Resource and Environment Science and Data Center ( <a href="https://www.resdc.cn">https://www.resdc.cn</a> )                                            |
|                 | Soil                                                                       | Harmonized World soil Database                                                                                                                          |
| Socioeconomic   | Digital Elevation Model                                                    | Geospatial Data cloud ( <a href="https://www.gscloud.cn/">https://www.gscloud.cn/</a> )                                                                 |
|                 | Crop benefits and costs, technology costs, water prices                    | Compilation of Cost Benefit of Major Agricultural Products Nationwide <a href="https://www.ndrc.gov.cn/fgsj/">https://www.ndrc.gov.cn/fgsj/</a>         |

### References

- Duan, Y., Zhou, S., He, J., & Bai, M. (2024). Improving the performance of agricultural temporary water markets: The role of technology-based and transaction-based subsidies. *Agricultural Water Management*, 303, 109062. <https://doi.org/10.1016/j.agwat.2024.109062>
- Grimm, V., Berger, U., Meyer, M., & Lorscheid, I. (2024). Theory for and from agent-based modelling: Insights from a virtual special issue and a vision. *Environmental Modelling & Software*, 178, 106088. <https://doi.org/10.1016/j.envsoft.2024.106088>
- Mialyk, O., Schyns, J. F., Booij, M. J., Su, H., Hogeboom, R. J., & Berger, M. (2024). Water footprints and crop water use of 175 individual crops for 1990–2019 simulated with a global crop model. *Scientific Data*, 11(1), 206. <https://doi.org/10.1038/s41597-024-03051-3>
- Nozari, S., Bailey, R. T., Rad, M. R., Smith, G. E. B., Andales, A. A., Zambreski, Z. T., et al. (2024). An integrated modeling approach to simulate human-crop-groundwater interactions in intensively irrigated regions. *Environmental Modelling & Software*, 179, 106120. <https://doi.org/10.1016/j.envsoft.2024.106120>
